# Supplementary material for: Amniotic Membrane Restores Chronic Wound Features to Normal in a Keratinocyte TGF-β-Chronified Cell Model
Source: MDPI journal article supplement (doi:10.3390/ijms24076210), 2023-03-25
Supplement: s1 [file s1]

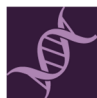

# Amniotic Membrane Restores Chronic Wound Features to Normal in a Keratinocyte TGF- $\beta$ -Chronified Cell Model

Sergio Liarte <sup>1,2,\*</sup>, Ángel Bernabé-García <sup>1</sup>, Mónica Rodríguez-Valiente <sup>1,2</sup>, José M. Moraleda <sup>3</sup>,  
Gregorio Castellanos <sup>4</sup> and Francisco J. Nicolás <sup>1,\*</sup>

<sup>1</sup> Laboratorio de Regeneración, Oncología Molecular y TGF- $\beta$ , IMIB-Arrixaca, El Palmar, 30120 Murcia, Spain

<sup>2</sup> Advanced Therapies in Regenerative Medicine Based on Molecular and Cellular Biology, Universidad Católica de Murcia (UCAM), Campus de los Jerónimos, Guadalupe, 30107 Murcia, Spain

<sup>3</sup> Unidad de Terapia Celular, Hospital Clínico Universitario Virgen de la Arrixaca, El Palmar, 30120 Murcia, Spain

<sup>4</sup> Unidad de Heridas Crónicas y Úlcera de Pie Diabético, Hospital Clínico Universitario Virgen de la Arrixaca, El Palmar, 30120 Murcia, Spain

\* Correspondence: sdll1@um.es (S.L.); franciscoj.nicolas2@carm.es (F.J.N.)

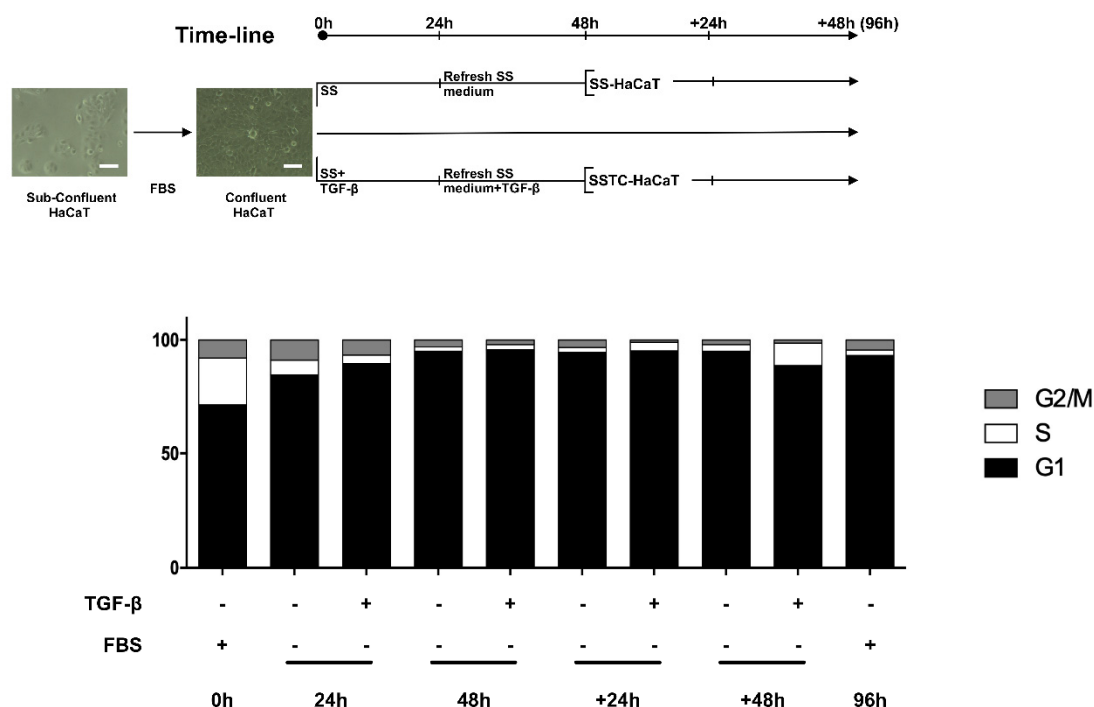

**Figure S1.** HaCaT confluent cells cultured under serum starvation conditions or in the presence of TGF $\beta$  experience a G1 cell cycle arrest and a complete halt on proliferation. The scheme describes how HaCaT cells were cultured in serum until they reached confluency. Then, they were deprived from serum and treated or not with TGF- $\beta$ . Cell cycle progression of each stage was assessed through flow cytometry. Cells were analysed and the indicated times for each condition and treatment. Replicates from three independent experiments were analysed and represented. Bar equals 100  $\mu$ m.

**Table S1.** Different primers used to study the expression of several genes.

| Primer Name        | Primer sequence 5'to 3'                  |
|--------------------|------------------------------------------|
| <i>GAPDH</i> -Fwd  | ACCACAGTCCATGCCATCAC                     |
| <i>GAPDH</i> -Rev  | TCCACCACCCTGTTGCTGTA                     |
| <i>PAI</i> -Fwd    | GACATCCTGGAAGTGCCTA                      |
| <i>PAI</i> -Rev    | GGTCATGTTGCCTTTCCAGT                     |
| <i>JUN</i> -Fwd    | GGAAACGACCTTCTATGACGATGCCC               |
| <i>JUN</i> -Rev    | GGCGCGCACGAAGCCCTCGGCGAACC               |
| <i>SNAI2</i> -Fwd  | GATGCCGCGCTCCTTCCTGGTC                   |
| <i>SNAI2</i> -Rev  | GCTGCTTATGTTTGGCCAGCC                    |
| <i>CDKN2B</i> -Fwd | ATGCGCGAGGAGAACAAG                       |
| <i>CDKN2B</i> -Rev | CTCCCGAAACGGTTGACTC                      |
| <i>CDKN1A</i> -Fwd | ATGTCAGAACCGGCTGGGGATG                   |
| <i>CDKN1A</i> -Rev | GGGCTTCCTCTTGAGAAAGATC                   |
| <i>GLB1</i>        | Proprietary sequence (Sigma KiCqStart)   |
| <i>IL6</i>         | Proprietary sequence (Qiagen QuantiTect) |
| <i>CYCA2</i>       | Proprietary sequence (Sigma KiCqStart)   |
| <i>FUCA1</i> -Fwd  | AGTCACCCTGTTGCCTATGG                     |
| <i>FUCA1</i> -Rev  | TTTGCGCTTTTAGATTGCT                      |
